# Supplementary material for: Effects of triphala and guggul aqueous extracts on inhibition of protein fibrillation and dissolution of preformed fibrils
Source: Royal Society of Chemistry journal article supplement (doi:10.1039/c6ra28440j), 2017-01-01
Supplement: c6ra28440j1.pdf [file c6ra28440j1.pdf]

**Supporting information:**

**Fig S1.** UV-Visible spectra of  $0.10 \text{ mg ml}^{-1}$  triphala and  $0.10 \text{ mg ml}^{-1}$  guggul extracts.

**Fig S2.** One dimensional  $^1\text{H}$  NMR spectra of triphala and guggul extracts at  $25^\circ\text{C}$  and pH 7.4.

**Fig S3.** One dimensional  $^1\text{H}$  NMR spectra of aqueous triphala extracts obtained from different sources: TW1: triphala powder; TW2: Himalaya Pharmacy Ltd Company, India; TW3: Zandu Ayurveda Ltd Company, India; and TW4: Shree Baidyanath Ayurved Bhavan Pvt Ltd India.

**Fig S4.** Far UV-CD spectra of lysozyme (A) at native state in presence of herbal extracts and (B) at different time interval of fibrillation process.

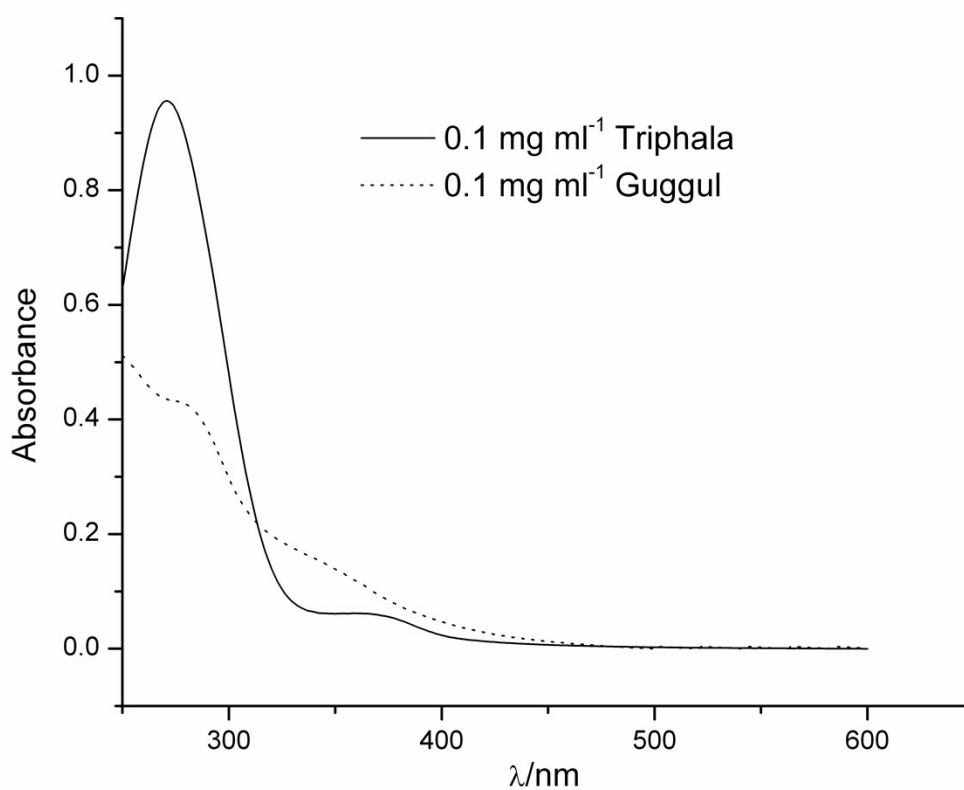

**FIG. S1**

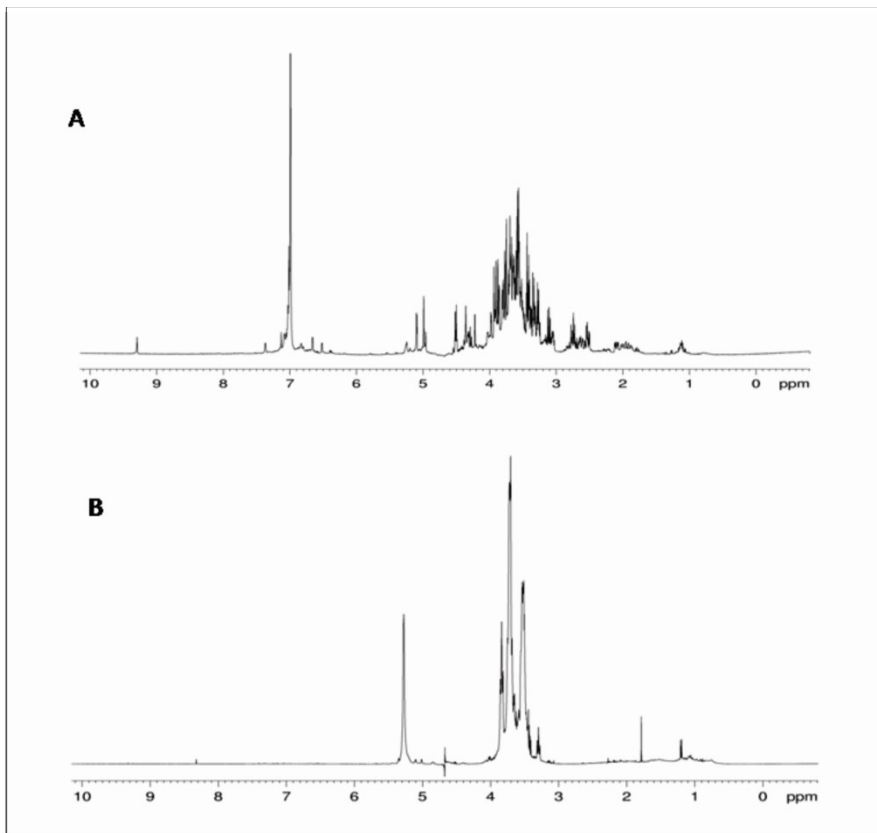

FIG. S2

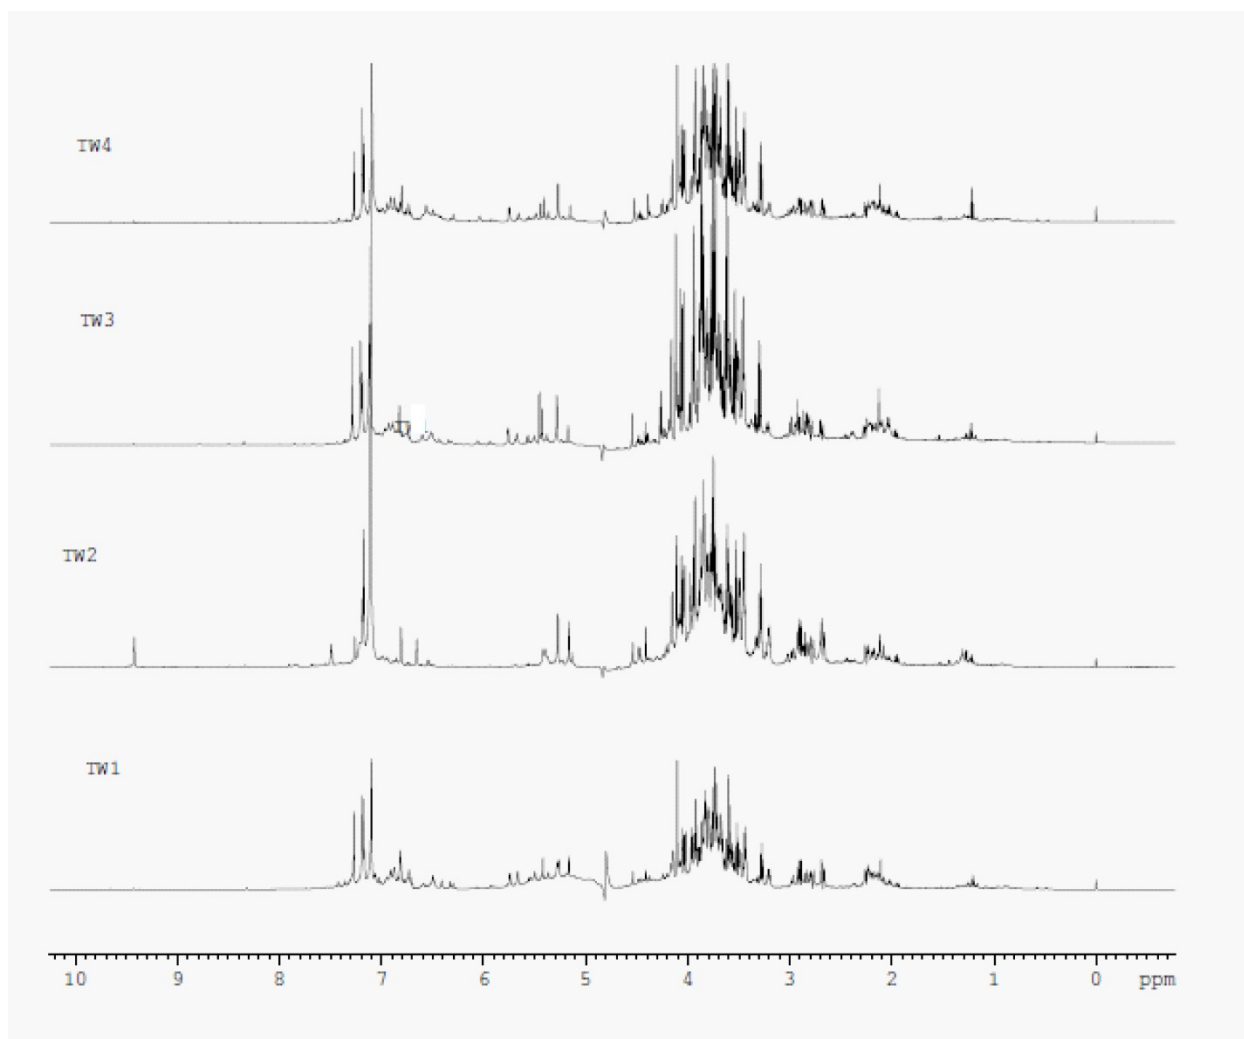

FIG. S3

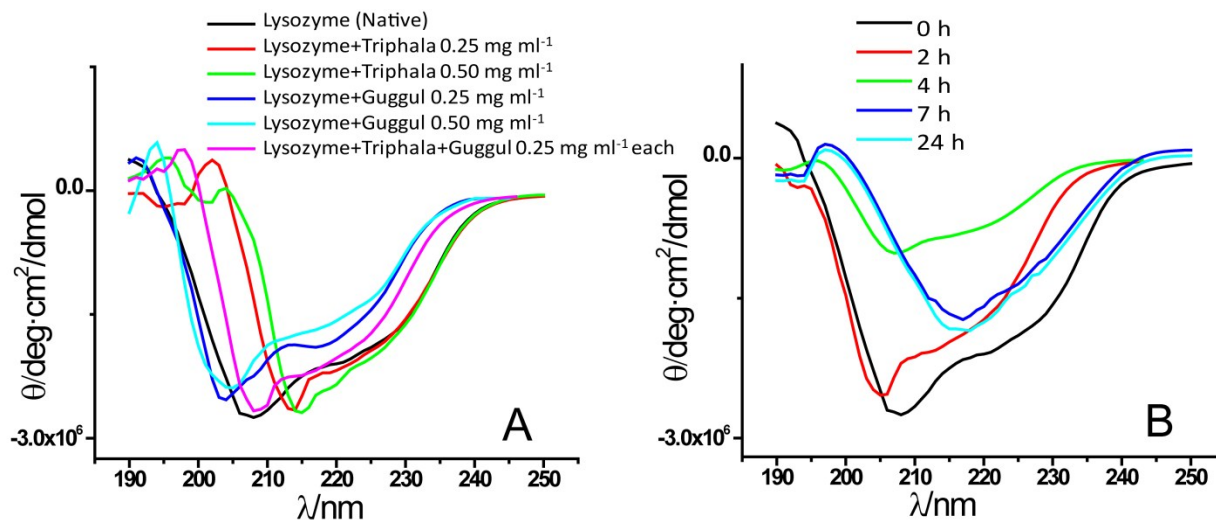

FIG. S4
